# Supplementary material
Source: publisher figshare collection journal article supplement (https://acs.figshare.com/ndownloader/files/9492592)
Supplement: Supplementary file 1 [file 9492592]

## Supplementary Information

### **Time-resolved fluorescence immunochromatographic assay developed using two idiotypic nanobodies for rapid, quantitative, and simultaneous detection of aflatoxin and zearalenone in maize and its products**

Xiaoqian Tang<sup>a,b,c,d,e</sup>, Peiwu Li<sup>a,b,e\*</sup>, Qi Zhang<sup>d\*</sup>, Zhaowei Zhang<sup>c\*</sup>,

Wen Zhang<sup>a,b,c</sup>, Jun Jiang<sup>a</sup>

<sup>a</sup> Oil Crops Research Institute, Chinese Academy of Agricultural Sciences, Wuhan 430062,  
China

<sup>b</sup> Key Laboratory of Biology and Genetic Improvement of Oil Crops, Ministry of Agriculture,  
Wuhan 430062, China

<sup>c</sup> Laboratory of Quality & Safety Risk Assessment for Oilseed Products (Wuhan), Ministry of  
Agriculture, Wuhan 430062, China

<sup>d</sup> Key Laboratory of Detection for Mycotoxins, Ministry of Agriculture, Wuhan 430062,  
China

<sup>e</sup> Quality Inspection & Test Center for Oilseed Products, Ministry of Agriculture, Wuhan  
430062, China

\* Corresponding authors at: Oil Crops Research Institute, Chinese Academy of Agricultural  
Sciences, Wuhan 430062, P.R.China

Tel.: +86 27 86812943

Fax: +86 27 86812862

E-mail: [peiwuli@oilcrops.cn](mailto:peiwuli@oilcrops.cn), [zhangqi01@caas.cn](mailto:zhangqi01@caas.cn), [zwzhang.zzw@gmail.com](mailto:zwzhang.zzw@gmail.com)

|    |                                                                               |
|----|-------------------------------------------------------------------------------|
| 24 |                                                                               |
| 25 | <b>Contents:</b>                                                              |
| 26 |                                                                               |
| 27 | 1. Purification of the anti-idiotypic nanobodies for AFB <sub>1</sub> and ZEN |
| 28 | 2. Preparation of Eu/Tb(III)-nanosphere fluorescence probe                    |
| 29 | 3. Preparation of two patterns of competitive TRFICA                          |
| 30 | 4. AIdnb-TRFICA for dual mycotoxins                                           |
| 31 | 5. Validation of the developed AIdnb-TRFICA for dual mycotoxin                |
| 32 | 6. LC-MS/ MS analysis used in validation experiments                          |

33 Purification of the anti-idiotypic nanobodies for AFB<sub>1</sub> and ZEN

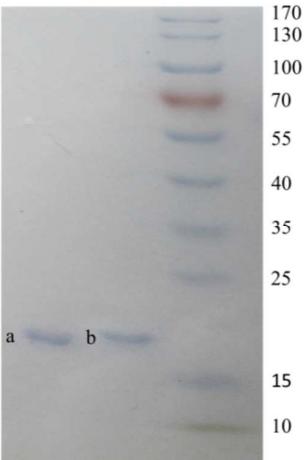

34  
35  
36 **Figure S1. Extraction and purification of nanobody**  
37 **(a, phage 8#; b, phage 2-5).**

38  
39 **Preparation of Eu/Tb(III)-nanosphere fluorescence probe**

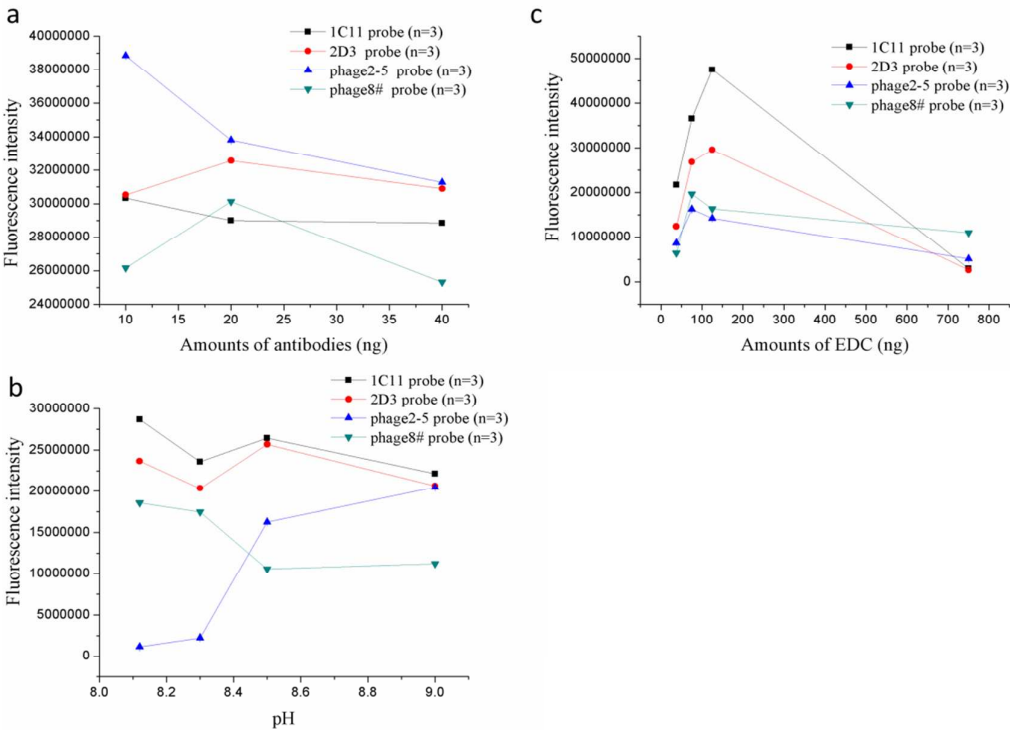

40  
41 **Figure S2. (a) Effect of amounts of antibodies, (b) pH of BB buffer, (c) and amounts of EDC on**  
42 **fluorescence intensity.**

#### 44 Preparation of two patterns of competitive TRFICA

45 The test strip for the AINnd-TRFICA pattern had a T line coated with the phage 2-5 or  
 46 phage 8# and a C line coated with the rabbit anti-mouse IgG. The test strip for the mAb-TRFICA  
 47 pattern had a T line coated with the 1C11 or 2D3 and a C line coated with the rabbit anti-apical  
 48 IgG. All the immunoreagents were spurted onto the nitrocellulose membrane (HF07502S25,  
 49 Millipore, Bedford, MA, USA) at the rate of 0.4 - 0.8 µg/cm. The nitrocellulose membrane was  
 50 dried for 2 h at 37°C. The sample pad was treated with blocking buffer (2.9% Na<sub>2</sub>HPO<sub>4</sub> + 0.3%  
 51 NaH<sub>2</sub>PO<sub>4</sub> + 1% Tween 20 + 1% PVPK 30 + 0.25% EDTA + 0.5% BSA + 0.02% NaN<sub>3</sub>) and  
 52 allowed to stand at 37°C for 6 h. Then, sample pad, NC membrane, and absorbent pad were pasted  
 53 onto a plastic scale board, overlapping with each other by 1 mm. Then, the assembly was cut into  
 54 4 × 60 mm strips with CM 4000 Guillotine Cutter.

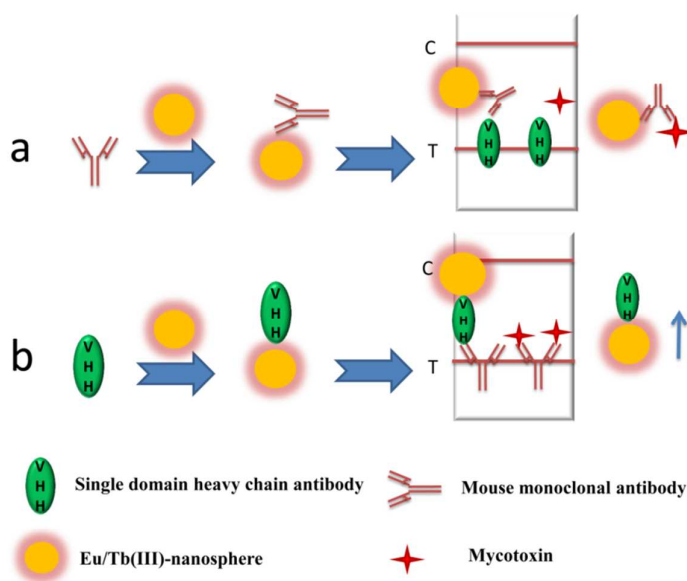

55  
 56 **Scheme S1. Schematic diagram of (a) AINnd-TRFICA for mycotoxin, (b) mAb-TRFICA for**  
 57 **mycotoxin.**

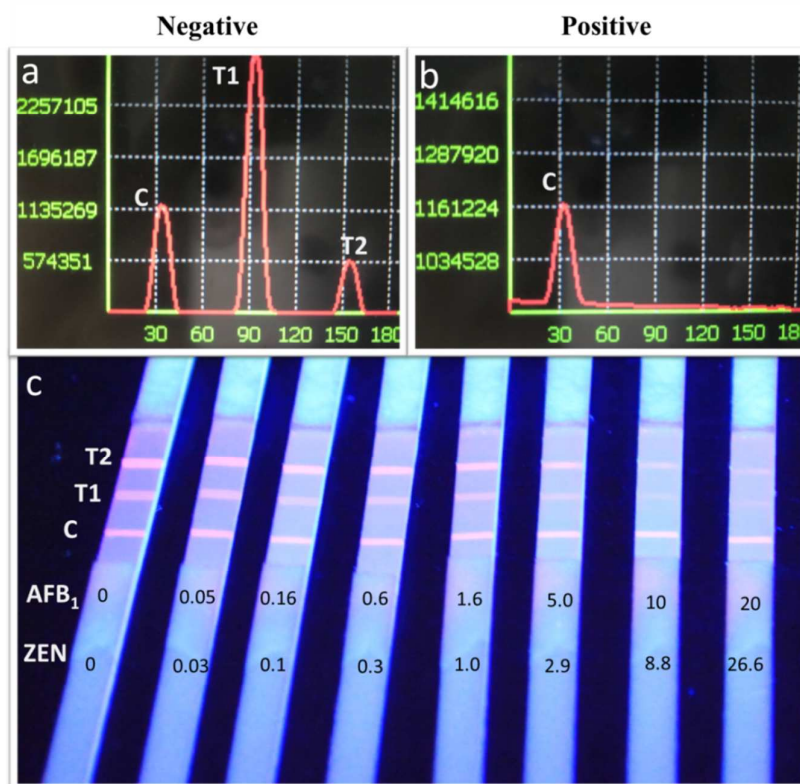

59  
60 **Figure S3. (a) negative. (b) positive. (c) Responses of the strips to AFB<sub>1</sub> and ZEN with different**  
61 **concentrations. The concentrations of AFB<sub>1</sub> and ZEN (ng mL<sup>-1</sup>) were increased from left to right.**

62 The appropriate amounts of antigen and antibody were optimized in an immunoassay to  
63 obtain a higher sensitivity. Therefore, the amounts of antigen on T and C lines and dilution of  
64 antibody probes were optimized (Table S1).

65

**Table S1. T/C values under various conditions.**

|          | Antigen on T line<br>(ng mL <sup>-1</sup> ) | C line (ng mL <sup>-1</sup> ) | Probe Dilute factor | T/C         |
|----------|---------------------------------------------|-------------------------------|---------------------|-------------|
|          | 0.25                                        | 0.05-0.25                     | 100-300             | -           |
| Phage2-5 | 0.50                                        | 0.05-0.25                     | 100-300             | 0.124-0.548 |
|          | 1.00                                        | 0.05-0.25                     | 100-300             | 0.152-1.412 |
|          | 0.25                                        | 0.05-0.25                     | 200-400             | -           |
| Phage8#  | 0.50                                        | 0.05-0.25                     | 200-400             | 0.392-1.284 |
|          | 1.00                                        | 0.05-0.25                     | 200-400             | 0.285-2.065 |

66

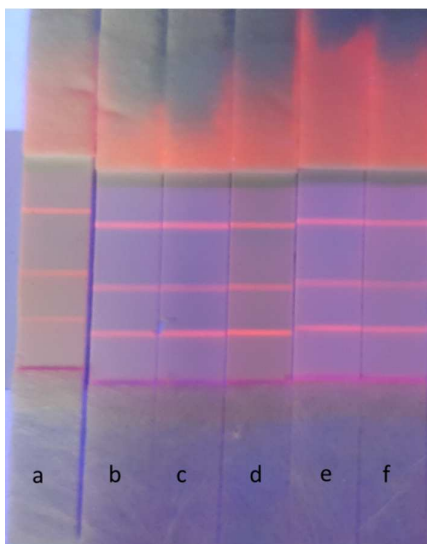

67

**Figure S4. Effects of different analysis buffer on the release of nanosphere-probe (a, 1% PVPK 30 + 1% Sucrose + ddH<sub>2</sub>O; b, 1% PVPK 30 + 1% BSA + ddH<sub>2</sub>O; c, 1% PVPK 30 + 2% Sucrose + 1% Tween 20 + ddH<sub>2</sub>O; d, 2% Sucrose + 1% Tween 20 + ddH<sub>2</sub>O; e, 2% Sucrose + 1% PVPK 30 + ddH<sub>2</sub>O ).**

72

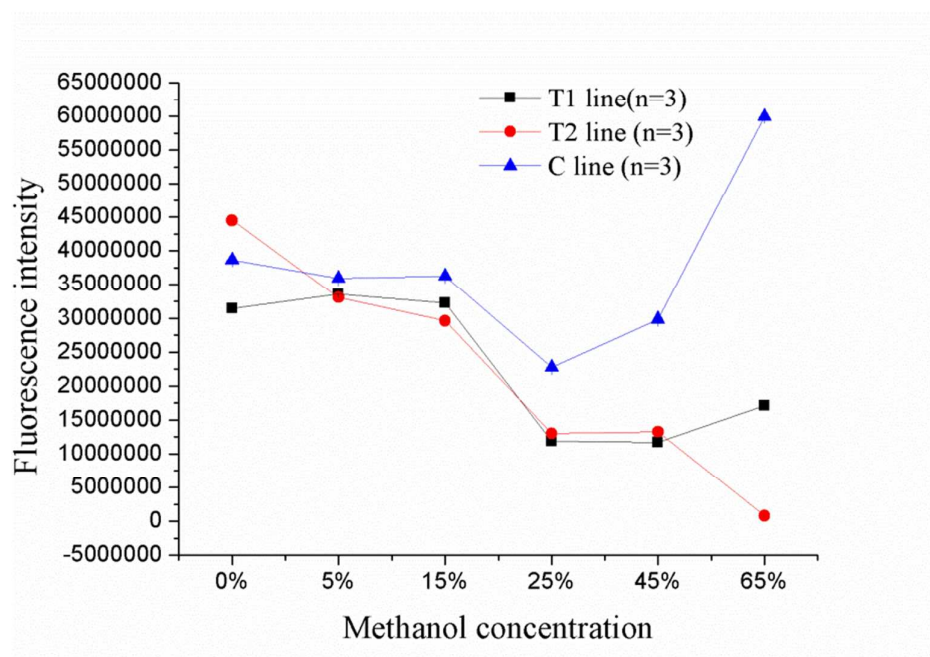

Figure S5. Effect of concentration of methanol on T/C value.

75 **Validation of the developed Aldnb-TRFICA for dual mycotoxin**

76 **Table S2. Recoveries of AFB<sub>1</sub> and ZEN in spiked samples by Aldnb-TRFICA**

| Mycotoxins       | samples      | Spiked concentration | Mean recovery | CV (%) <sup>a</sup> |
|------------------|--------------|----------------------|---------------|---------------------|
|                  |              | (ng)                 | (%)           |                     |
| AFB <sub>1</sub> | Yellow maize | 10                   | 106.6         | 7.6                 |
|                  |              | 20                   | 90.3          | 5.4                 |
|                  |              | 50                   | 83.3          | 6.8                 |
|                  | White maize  | 10                   | 94.2          | 8.1                 |
|                  |              | 20                   | 80.5          | 7.4                 |
|                  |              | 50                   | 73.9          | 7.7                 |
|                  | Maize flour  | 10                   | 81.4          | 9.1                 |
|                  |              | 20                   | 72.6          | 8.2                 |
|                  |              | 50                   | 83.8          | 9.6                 |
| ZEN              | Yellow maize | 20                   | 91.0          | 7.7                 |
|                  |              | 100                  | 85.3          | 6.6                 |
|                  |              | 500                  | 81.9          | 7.1                 |
|                  | White maize  | 20                   | 80.2          | 10.3                |
|                  |              | 100                  | 78.5          | 9.8                 |
|                  |              | 500                  | 77.7          | 8.3                 |
|                  | Maize flour  | 20                   | 87.2          | 10.6                |
|                  |              | 100                  | 82.1          | 9.6                 |
|                  |              | 500                  | 75.6          | 5.8                 |

<sup>a</sup> Coefficient of variation

78     **LC-MS/ MS analysis used in validation experiments**

79             The ground sample (5 g) was mixed with 10 mL of acetonitrile/water (80:20 v/v) and  
80     shaken for 2 h. The clear extract was filtered using a 0.22- $\mu$ m membrane filter before analysis by  
81     LC-MS/MS.

82             The LC-MS system was an Accela HPLC connected to a triple quadrupole MS analyzer  
83     with an electrospray ionization (ESI) interface (Thermo Fisher Scientific, USA). A 10- $\mu$ L aliquot  
84     was injected into a C18 column (Hypersil Gold, 100 mm  $\times$  2.1 mm i.d., 3  $\mu$ m, Thermo Fisher  
85     Scientific) at 30°C column temperature. The gradient was composed of solvents (A, v/v) 50%  
86     methanol-acetonitrile and (B, v/v) 0.1% formic acid in water at a flow rate of 200  $\mu$ L/min. The  
87     gradient elution was performed as follows: 0 min, 15% A; 8.5 min, 50% A; 10 min, 50% A; 11.5  
88     min, 70% A; 13.5 min, 70% A; 15 min, 100% A; 15.01 min, 15% A; 20 min, 15% A.

89             The MS detection was equipped with an ESI source in negative and positive selected  
90     reaction monitoring (SRM) modes<sup>1</sup>. MS was measured with the following conditions: for the  
91     positive scan mode, spray voltage, 4000 V; sheath gas pressure, 20 psi; capillary temperature,  
92     330°C; however, for the negative scan mode, aux gas pressure, 8 psi; spray voltage, 3000 V and  
93     capillary temperature, 270°C. The parent and two daughter ions were 313/241.1, 285 for AFB<sub>1</sub> and  
94     317.1/130.8, 174.9 for ZEN.

95     **Reference**

96     1. Wu, R.; Zhang, W.; Wang, X.. Food Chem 2016, 204, 334-342.

97
